**Title:**

**Alzheimer's disease pathogenesis is dependent on neuronal receptor PTP $\sigma$**

**Authors:**

Yuanzheng Gu<sup>1</sup>, Yaoling Shu<sup>1</sup>, Angela W. Corona<sup>2</sup>, Kui Xu<sup>1§</sup>, Allen F. Yi<sup>1</sup>, Shannon Chen<sup>1</sup>, Man Luo<sup>1†</sup>, John G. Flanagan<sup>3</sup>, Michel L. Tremblay<sup>4</sup>, Gary E. Landreth<sup>2</sup>, Randy J. Nelson<sup>1</sup>, Jerry Silver<sup>2</sup>, Yingjie Shen<sup>1\*</sup>

**Affiliation:**

<sup>1</sup>Department of Neuroscience, Neuroscience Research Institute, The Ohio State University Wexner Medical Center, 460 West 12th Ave, Columbus, OH 43210, USA.

<sup>2</sup>Case Western Reserve University. 10900 Euclid Ave, Cleveland, OH 44106

<sup>§</sup>Current address: Division of Neurosurgery, Cincinnati Children's Hospital Medical Center, 3333 Burnet Ave, Cincinnati, OH 45229, USA.

<sup>†</sup>Current address: Department of Biostatistics, School of Public Health, Boston University, 715 Albany St, Boston, MA 02118, USA.

<sup>3</sup>Department of Cell Biology, Harvard Medical School, Boston, MA 02115, USA.

<sup>4</sup>Department of Biochemistry and Goodman Cancer Research Centre, McGill University, 1160 Avenue des Pins, Montréal, Quebec, Canada H3A 1A3.

\*Correspondence to: [yingjie.shen@osumc.edu](mailto:yingjie.shen@osumc.edu)

**Acknowledgements** We thank Dennis Selkoe, Jared Cregg, and Miriam Osterfield for scientific discussion; Anthony Brown, Christopher Edwards, Bradley Lang, Patricia Hess, Yan Wang for comments on the manuscript; Jonathan Cherry for technical support on imaging; Li Zhang for technical advice on rodent pathology. The behavioral data were collected with the support of National Institute of Neurological Disorders and Stroke Grant P30 NS045758. A $\beta$  ELISA analyses were performed with the support of R01 AG043522-01 to Landreth (PI) by National Institutes of Health. The rest of the work was supported by Ohio State University Startup Funds to Shen (PI).

**Author contributions** YG, YS, AWC, KX, AFY, SC, and ML conducted experiments and data analyses, under the supervision of GEL, RJN, and Y Shen. YG, KX, and AWC also provided comments on the manuscript. MLT provided PTP $\sigma$ -deficient mice, advised on PTP $\sigma$  characterization, and commented on the manuscript. JS, GEL, and RJN advised on experimental design and commented on the manuscript. Y Shen conceived the project, designed the study, and wrote the paper.

**Author Information** Reprints and permissions information is available at [www.nature.com/reprints](http://www.nature.com/reprints). The authors declare no competing financial interests. Readers are welcome to comment on the online version of the paper. Correspondence and requests for materials should be addressed to Y Shen ([yingjie.shen@osumc.edu](mailto:yingjie.shen@osumc.edu)).

*Note: as there are 2 authors whose initials are YS, the last author is noted as “Y Shen”.*

**Abstract:**

**$\beta$ -amyloid accumulation and Tau aggregation are hallmarks of Alzheimer's disease, yet their underlying molecular mechanisms remain obscure, hindering therapeutic advances. Here we report that neuronal receptor PTP $\sigma$  mediates both  $\beta$ -amyloid and Tau pathogenesis in two mouse models. In the brain, PTP $\sigma$  binds to  $\beta$ -amyloid precursor protein (APP). Depletion of PTP $\sigma$  reduces the affinity between APP and  $\beta$ -secretase, diminishing APP proteolytic products by  $\beta$ - and  $\gamma$ -cleavage without affecting other major substrates of the secretases, suggesting a specificity of  $\beta$ -amyloidogenic regulation. In human APP transgenic mice during aging, the progression of  $\beta$ -amyloidosis, Tau aggregation, neuroinflammation, synaptic loss, as well as behavioral deficits, all show unambiguous dependency on the expression of PTP $\sigma$ . Additionally, the aggregates of endogenous Tau are found in a distribution pattern similar to that of early stage neurofibrillary tangles in Alzheimer brains. Together, these findings unveil a gatekeeping role of PTP $\sigma$  upstream of the degenerative pathogenesis, indicating a potential for this neuronal receptor as a drug target for Alzheimer's disease.**

1 **Main Text:**

2 A definitive pathological hallmark of Alzheimer's disease (AD) is the progressive  
3 aggregation of  $\beta$ -amyloid ( $A\beta$ ) peptides in the brain, a process also known as  $\beta$ -  
4 amyloidosis, which is often accompanied by neuroinflammation and formation of  
5 neurofibrillary tangles containing Tau, a microtubule binding protein.

6 Although the etiological mechanisms of AD have been an ongoing debate,  
7 concrete evidence from human genetic studies showed that overproduction of  $A\beta$  due to  
8 gene mutations inevitably inflicts cascades of cytotoxic events, ultimately leading to  
9 neurodegeneration and decay of brain functions. Accumulation of  $A\beta$  peptides, especially  
10 in their soluble forms, is therefore recognized as a key culprit in the development of AD  
11 <sup>1</sup>. In the brain,  $A\beta$  peptides mainly derive from sequential cleavage of neuronal amyloid  
12 precursor protein (APP) by the  $\beta$ - and  $\gamma$ -secretases. However, despite decades of research,  
13 molecular regulation of the amyloidogenic secretase activities remains poorly understood,  
14 hindering the design of therapeutics to specifically target the APP amyloidogenic  
15 pathway.

16 Pharmacological inhibition of the  $\beta$ - and  $\gamma$ -secretase activities, although effective  
17 in suppressing  $A\beta$  production, interferes with physiological function of the secretases on  
18 their other substrates. Such intervention strategies therefore are often innately associated  
19 with untoward side effects, which have led to several failed clinical trials in the past <sup>2-4</sup>.  
20 To date, no therapeutic regimen is available to prevent the onset of AD or curtail its  
21 progression.

22 Here we report our findings that identify neuronal receptor PTP $\sigma$  (protein tyrosine  
23 phosphatase sigma) as a potential molecular target to curb  $A\beta$  pathogenesis. Genetic

1 depletion of PTP $\sigma$  lowers  $\beta$ -secretase affinity to APP and suppresses A $\beta$  accumulation in  
2 a specific manner that does not generically inhibit  $\beta$ - and  $\gamma$ -secretase activities.

3 Besides A $\beta$ , Tau is another biomarker that has been intensively studied in AD.  
4 Cognitive decline in patients often correlates better with Tau pathology than with A $\beta$   
5 burden<sup>5,6</sup>. Overwhelming evidence also substantiated that malfunction of Tau contributes  
6 to synaptic loss and neuronal deterioration<sup>7</sup>. However, what triggers the pathological  
7 changes of Tau in AD remains a mystery. Whether neurotoxic A $\beta$  can lead to Tau  
8 pathology *in vivo* has been a debate since quintessential neurofibrillary Tau tangles have  
9 not been reported in any of the APP transgenic mouse models, even in those with severe  
10 cerebral  $\beta$ -amyloidosis. Here we show that during the process of aging, Tau aggregates  
11 form in the brains of two APP transgenic mouse models with a similar distribution  
12 pattern as seen in postmortem AD brains, suggesting that Tau misfolding can develop as  
13 an event downstream from the expression of amyloidogenic APP transgenes. Genetic  
14 depletion of PTP $\sigma$ , which suppresses A $\beta$  accumulation, also inhibits the aggregation of  
15 Tau.

16 In the two mouse models we studied, a spectrum of AD neuropathologies and  
17 behavioral deficits all demonstrate a clear dependency on PTP $\sigma$ , indicating that this  
18 neuronal receptor is a pivotal upstream player in AD pathogenesis.

19

## 20 **PTP $\sigma$ is an APP binding partner in the brain.**

21 Previously identified as a neuronal receptor of extracellular proteoglycans<sup>8-10</sup>,  
22 PTP $\sigma$  is expressed throughout the adult nervous system, most predominantly in the  
23 hippocampus<sup>11,12</sup>, one of earliest affected brain regions in AD. Using

1 immunohistochemistry and confocal imaging, we found that PTP $\sigma$  and APP (the  
2 precursor of A $\beta$ ) colocalize in hippocampal pyramidal neurons of adult rat brains, most  
3 intensively in the initial segments of apical dendrites, and in the perinuclear and axonal  
4 regions with a punctate pattern (Fig. 1a-f). To assess whether this colocalization reflects a  
5 binding interaction between these two molecules, we tested their co-immunoprecipitation  
6 from brain homogenates. In brains of rats and mice with different genetic background,  
7 using various antibodies of APP and PTP $\sigma$ , we consistently detected a fraction of PTP $\sigma$   
8 that co-immunoprecipitates with APP, providing evidence of a molecular complex  
9 between these two transmembrane proteins (Fig. 1h, i; Extended Data Fig. 1).

10

### 11 **Genetic depletion of PTP $\sigma$ reduces $\beta$ -amyloidogenic products of APP.**

12 The molecular interaction between PTP $\sigma$  and APP prompted us to investigate  
13 whether PTP $\sigma$  plays a role in amyloidogenic processing of APP. In neurons, APP is  
14 mainly processed through alternative cleavage by either  $\alpha$ - or  $\beta$ -secretase. These  
15 secretases release the N-terminal portion of APP from its membrane-tethering C-terminal  
16 fragment (CTF $\alpha$  or CTF $\beta$ , respectively), which can be further processed by the  $\gamma$ -  
17 secretase<sup>13,14</sup>. Sequential cleavage of APP by the  $\beta$ - and  $\gamma$ -secretases is regarded as  
18 amyloidogenic processing since it produces A $\beta$  peptides<sup>15</sup>. When overproduced, the A $\beta$   
19 peptides can form soluble oligomers that trigger ramification of cytotoxic cascades,  
20 whereas progressive aggregation of A $\beta$  eventually results in the formation of senile  
21 plaques in the brains of AD patients (Fig. 2a). To test the effect of PTP $\sigma$  in this  
22 amyloidogenic processing, we analyzed the levels of APP  $\beta$ - and  $\gamma$ -cleavage products in  
23 mouse brains with or without PTP $\sigma$ .

1 Western blot analysis with protein extracts from mouse brains showed that  
2 genetic depletion of PTP $\sigma$  does not affect the expression level of full length APP (Fig.  
3 2b; Extended Data Fig 2a). However, an antibody against the C-terminus of APP detects  
4 a band at a molecular weight consistent with CTF $\beta$ , which is reduced in PTP $\sigma$ -deficient  
5 mice as compared to their age- sex-matched wild type littermates (Fig. 2b). Additionally,  
6 in two AD mouse models expressing human APP genes with amyloidogenic mutations  
7 <sup>16,17</sup>, we observed a similar decrease of an APP CTF upon PTP $\sigma$  depletion (Fig. 2b;  
8 Extended Data Fig. 2b). The TgAPP-SwDI and TgAPP-SwInd mice, each expressing a  
9 human APP transgene harboring the Swedish mutation near the  $\beta$ -cleavage site, were  
10 crossed with the PTP $\sigma$  line to generate offsprings that are heterozygous for their  
11 respective APP transgene, with or without PTP $\sigma$ . Because the Swedish mutation carried  
12 by these APP transgenes is prone to  $\beta$ -cleavage, the predominant form of APP CTF in  
13 these transgenic mice is predicted to be CTF $\beta$ . Thus, the reduction of APP CTF in PTP $\sigma$ -  
14 deficient APP transgenic mice may indicate a regulatory role of PTP $\sigma$  on CTF $\beta$  level.  
15 However, since the APP C-terminal antibody used in these experiments can recognize  
16 both CTF $\alpha$  and CTF $\beta$ , as well as the phosphorylated species of these CTFs (longer  
17 exposure of western blots showed multiple CTF bands), judging the identity of the  
18 reduced CTF simply by its molecular weight may be inadequate. We therefore performed  
19 CTF $\beta$  immunopurification with subsequent western blot detection, using an antibody that  
20 recognizes CTF $\beta$  but not CTF $\alpha$  (Fig. 2c, d; Extended Data Fig. 2c, d). With this  
21 definitive method, we confirmed that PTP $\sigma$  depletion decreases the level of CTF $\beta$   
22 originated from both mouse endogenous and human transgenic APP.

1           Because CTF $\beta$  is an intermediate proteolytic product between  $\beta$ - and  $\gamma$ -cleavage,  
2 its decreased steady state level could result from either reduced production by  $\beta$ -cleavage  
3 or increased degradation by subsequent  $\gamma$ -secretase cleavage (Fig. 2a). To distinguish  
4 between these two possibilities, we measured the level of A $\beta$  peptides, which are  
5 downstream products from CTF $\beta$  degradation by  $\gamma$ -cleavage. Using ELISA assays with  
6 brain homogenates from the TgAPP-SwDI mice, we found that PTP $\sigma$  depletion decreases  
7 the levels of A $\beta$  peptides to a similar degree as that of CTF $\beta$  (Fig. 2e, f). Consistently, as  
8 A $\beta$  peptides gradually aggregate into plaques during aging of the transgenic mice, we  
9 observed a substantial decrease of cerebral A $\beta$  deposition in APP transgenic PTP $\sigma$ -  
10 deficient mice as compared to the age-matched APP transgenic littermates expressing  
11 wild type PTP $\sigma$  (Fig. 2g, h; Extended Data Fig. 2e, f). Thus, the concurrent decrease of  $\beta$ -  
12 and  $\gamma$ -cleavage products argues against an increased  $\gamma$ -secretase activity, but instead  
13 suggests a reduced  $\beta$ -secretase cleavage of APP, which suppresses not only the level of  
14 CTF $\beta$  but also downstream A $\beta$  production in PTP $\sigma$ -deficient brains.

15

### 16 **Curtailed progression of $\beta$ -amyloidosis in the absence of PTP $\sigma$ .**

17           Progressive cerebral A $\beta$  aggregation ( $\beta$ -amyloidosis) is regarded as a benchmark  
18 of AD progression. To investigate the effects of PTP $\sigma$  on this pathological development,  
19 we monitored A $\beta$  deposits in the brains of 9-month old (mid-aged) and 16-month old  
20 (aged) TgAPP-SwDI mice. At 9 months of age, A $\beta$  deposits are found predominantly in  
21 the hippocampus, especially in the hilus of the dentate gyrus (DG) (Fig. 2g, h). By 16  
22 months, the pathology spreads massively throughout the entire brain. The propagation of



1 A $\beta$  deposition, however, is curbed by genetic depletion of PTP $\sigma$ , as quantified using the  
2 DG hilus as a representative area (Fig. 2i). Between the ages of 9 and 16 months, the A $\beta$   
3 burden is more than doubled in TgAPP-SwDI mice expressing wild type PTP $\sigma$  [APP-  
4 SwDI(+) $PTP\sigma$ (+/+)], but only shows marginal increase in the transgenic mice lacking  
5 functional PTP $\sigma$  [APP-SwDI(+) $PTP\sigma$ (-/-)]. Meanwhile, the A $\beta$  loads measured in 9-  
6 month old APP-SwDI(+) $PTP\sigma$ (+/+) mice are similar to those of 16-month old APP-  
7 SwDI(+) $PTP\sigma$ (-/-) mice ( $p=0.95$ ), indicating a restraint of disease progression by PTP $\sigma$   
8 depletion (Fig. 2i).

9

#### 10 **Decreased BACE1-APP affinity in PTP $\sigma$ -deficient brains.**

11 Consistent with these observations that suggest a facilitating role of PTP $\sigma$  in APP  
12  $\beta$ -cleavage, our data further reveal that PTP $\sigma$  depletion weakens the interaction of APP  
13 with BACE1, the  $\beta$ -secretase in the brain. To test the *in vivo* affinity between BACE1  
14 and APP, we performed co-immunoprecipitation of the enzyme and substrate from mouse  
15 brain homogenates in buffers with serially increased detergent stringency. Whereas  
16 BACE1-APP association is nearly equal in wild type and PTP $\sigma$ -deficient brains under  
17 mild buffer conditions, increasing detergent stringency in the buffer unveils that the  
18 molecular complex is more vulnerable to dissociation in brains without PTP $\sigma$  (Fig. 3).  
19 Thus a lower BACE1-APP affinity in PTP $\sigma$ -deficient brains may likely be an underlying  
20 mechanism for the decreased levels of CTF $\beta$  and its derivative A $\beta$ .

21 Although it cannot be ruled out that some alternative uncharacterized pathway  
22 may contribute to the parallel decrease of CTF $\beta$  and A $\beta$  in PTP $\sigma$ -deficient brains, these

1 data consistently support the notion that PTP $\sigma$  regulates APP amyloidogenic processing,  
2 likely via facilitation of BACE1 activity on APP, the initial process of A $\beta$  production.

3

#### 4 **The specificity of $\beta$ -amyloidogenic regulation by PTP $\sigma$ .**

5 The constraining effect of PTP $\sigma$  on APP amyloidogenic products led us to further  
6 question whether this observation reflects a specific regulation of APP metabolism, or  
7 alternatively, a general modulation on the  $\beta$ - and  $\gamma$ -secretases. We first assessed the  
8 expression level of these secretases in mouse brains with or without PTP $\sigma$ , and found no  
9 change for BACE1 or the essential subunits of  $\gamma$ -secretase (Fig. 4a, b). Additionally, we  
10 tested whether PTP $\sigma$  broadly modulates  $\beta$ - and  $\gamma$ -secretase activities, by examining the  
11 proteolytic processing of their other substrates. Besides APP, Neuregulin1 (NRG1)<sup>18-20</sup>  
12 and Notch<sup>21-23</sup> are the major *in vivo* substrates of BACE1 and  $\gamma$ -secretase, respectively.  
13 Neither BACE1 cleavage of NRG1 nor  $\gamma$ -secretase cleavage of Notch is affected by  
14 PTP $\sigma$  deficiency (Fig. 4c, d). Taken together, these data rule out a generic modulation of  
15  $\beta$ - and  $\gamma$ -secretases, but rather suggest a specificity of APP amyloidogenic regulation by  
16 PTP $\sigma$ .

17

#### 18 **PTP $\sigma$ depletion relieves neuroinflammation and synaptic impairment in APP** 19 **transgenic mice.**

20 Substantial evidence from earlier studies has established that overproduction of  
21 A $\beta$  in the brain elicits multiplex downstream pathological events, including chronic  
22 inflammatory responses of the glia, such as persistent astrogliosis. The reactive

1 (inflammatory) glia would then crosstalk with neurons, evoking a vicious feedback loop  
2 that amplifies neurodegeneration during disease progression<sup>24-26</sup>.

3 The TgAPP-SwDI model is one of the earliest to develop neurodegenerative  
4 pathologies and behavioral deficits among many existing AD mouse models<sup>16</sup>. We  
5 therefore chose these mice to further examine the role of PTP $\sigma$  in AD pathologies  
6 downstream of neurotoxic A $\beta$ .

7 The APP-SwDI(+) $PTP\sigma$ (+/+) mice, which express the TgAPP-SwDI transgene  
8 and wild type PTP $\sigma$ , have developed severe neuroinflammation in the brain by the age of  
9 9 months, as measured by the level of GFAP (glial fibrillary acidic protein), a marker of  
10 astrogliosis (Extended Data Fig. 3). In the DG hilus, for example, GFAP expression level  
11 in the APP-SwDI(+) $PTP\sigma$ (+/+) mice is more than tenfold compared to that in age-  
12 matched non-transgenic littermates [APP-SwDI(-) $PTP\sigma$ (+/+)] (Extended Data Fig. 3b).  
13 PTP $\sigma$  deficiency, however, effectively attenuates astrogliosis induced by the  
14 amyloidogenic transgene. In the APP-SwDI(+) $PTP\sigma$ (-/-) brains, depletion of PTP $\sigma$   
15 restores GFAP expression back to a level close to that of non-transgenic wild type  
16 littermates (Extended Data Fig. 3b).

17 Among all brain regions, the most affected by the expression of TgAPP-SwDI  
18 transgene appears to be the hilus of the DG, where A $\beta$  deposition and astrogliosis are  
19 both found to be the most severe (Fig. 2g, h; Extended Data Fig. 3). We therefore  
20 questioned whether the pathologies in this area have an impact on the mossy fiber axons  
21 of DG pyramidal neurons, which project through the hilus into the CA3 region, where  
22 they synapse with the CA3 dendrites. Upon examining the presynaptic markers in CA3  
23 mossy fiber terminal zone, we found decreased levels of Synaptophysin and Synapsin-1

1 in the APP-SwDI(+) $PTP\sigma$ (+/+) mice, comparing to their age-matched non-transgenic  
2 littermates (Extended Data Fig. 4, data not shown for Synapsin-1). Such synaptic  
3 impairment, evidently resulting from the expression of the APP transgene and possibly  
4 the overproduction of  $A\beta$ , is reversed by genetic depletion of  $PTP\sigma$  in the APP-  
5 SwDI(+) $PTP\sigma$ (-/-) mice (Extended Data Fig. 4).

6 Interestingly, we noticed that the APP-SwDI(+) $PTP\sigma$ (-/-) mice sometimes express  
7 higher levels of presynaptic markers in the CA3 terminal zone than their age-matched  
8 non-transgenic wild type littermates (Extended Data Fig. 4g). This observation, although  
9 not statistically significant in our quantification analysis, may suggest an additional  
10 synaptic effect of  $PTP\sigma$  that is independent of the APP transgene, as observed in previous  
11 studies<sup>27</sup>.

### 13 **Tau pathology in aging AD mouse brains is dependent on $PTP\sigma$ .**

14 Neurofibrillary tangles composed of hyperphosphorylated and aggregated Tau are  
15 commonly found in AD brains. These tangles tend to develop in a hierarchical pattern,  
16 appearing first in the entorhinal cortex before spreading to other brain regions<sup>5,6</sup>. The  
17 precise mechanism of tangle formation, however, is poorly understood. The fact that Tau  
18 tangles and  $A\beta$  deposits can be found in separate locations in postmortem brains has led  
19 to the question of whether Tau pathology in AD is independent of  $A\beta$  accumulation<sup>5,6</sup>.  
20 Additionally, despite severe cerebral  $\beta$ -amyloidosis in many APP transgenic mouse  
21 models, Tau tangles have not been reported, further questioning the relationship between  
22  $A\beta$  and Tau pathologies *in vivo*.

1           Nonetheless, a few studies did show non-tangle like assemblies of Tau in  
2 dystrophic neurites surrounding A $\beta$  plaques in APP transgenic mouse lines<sup>28-30</sup>, arguing  
3 that A $\beta$  can be a causal factor for Tau dysregulation, despite that the precise nature of  
4 Tau pathologies may be different between human and mouse. In our histological analysis  
5 using an antibody against the proline-rich domain of Tau, we observed Tau aggregation  
6 in the brains of both TgAPP-SwDI and TgAPP-SwInd mice during the course of aging  
7 (around 9 months for the both the APP-SwDI(+) $PTP\sigma$ (+/+) mice and 15 months for the  
8 APP-SwInd(+) $PTP\sigma$ (+/+) mice) (Fig. 5; Extended Data Fig. 5). Such aggregation is not  
9 seen in aged-matched non-transgenic littermates (Fig. 5h), suggesting that it is a  
10 pathological event downstream from the expression of amyloidogenic APP transgenes,  
11 possibly a result of A $\beta$  cytotoxicity. Genetic depletion of  $PTP\sigma$ , which diminishes A $\beta$   
12 levels, suppresses Tau aggregation in both TgAPP-SwDI and TgAPP-SwInd mice (Fig.  
13 5; Extended Data Fig. 5).

14           Upon closer examination, the Tau aggregates are often found in punctate shapes,  
15 likely in debris from degenerated cell bodies and neurites, scattered in areas free of  
16 nuclear staining (Extended Data Fig. 6a-f). Rarely, a few are in fibrillary structures,  
17 probably in degenerated cells before disassembling (Extended Data Extended Data Fig.  
18 6g, h). In both TgAPP-SwDI and TgAPP-SwInd mice, the Tau aggregates are found  
19 predominantly in the molecular layer of the piriform and entorhinal cortices, and  
20 occasionally in the hippocampal region (Fig. 5; Extended Data Fig. 5), reminiscent of the  
21 early stage tangle locations in AD brains<sup>31</sup>. To confirm these findings, we used an  
22 additional antibody recognizing the C-terminus of Tau and detected the same  
23 morphologies (Extended Data Fig. 6i) and distribution pattern (Fig. 5a).

1           Consistent with the findings in postmortem AD brains, the distribution pattern of  
2   Tau aggregates in the TgAPP-SwDI brain does not correlate with that of A $\beta$  deposition,  
3   which is pronounced in the hippocampus yet barely detectable in the piriform or  
4   entorhinal cortex at the age of 9 months (Fig. 2g, h). Given that the causation of Tau  
5   pathology in these mice is possibly related to the overproduced A $\beta$ , the segregation of A $\beta$   
6   and Tau depositions in different brain regions may indicate that the cytotoxicity  
7   originates from soluble A $\beta$  instead of the deposited amyloid. It is also evident that  
8   neurons in different brain regions are not equally vulnerable to developing Tau  
9   pathology.

10           We next examined whether the expression of APP transgenes or genetic depletion  
11   of PTP $\sigma$  regulates Tau aggregation by changing its expression level and/or  
12   phosphorylation status. Western blot analysis of brain homogenates showed that Tau  
13   protein expression is not affected by the APP transgenes or PTP $\sigma$  (Extended Data Fig. 7),  
14   suggesting that the aggregation may be due to local misfolding of Tau rather than an  
15   overexpression of this protein. Moreover, the TgAPP-SwDI or TgAPP-SwInd transgene,  
16   which apparently causes Tau aggregation, does not enhance the phosphorylation of Tau  
17   residues including Serine191, Therionine194, and Therionine220 (data not shown),  
18   whose homologues in human Tau (Serine202, Therionine205, and Therionine231) are  
19   typically hyperphosphorylated in neurofibrillary tangles. These findings are consistent  
20   with a recent quantitative study showing similar post-translational modifications in wild  
21   type and TgAPP-SwInd mice<sup>32</sup>. Furthermore, unlike previously reported<sup>28,29</sup>, we could  
22   not detect these phosphorylated residues in the Tau aggregates, suggesting that the  
23   epitopes are either missing (residues not phosphorylated or cleaved off) or embedded

1 inside the misfolding. Given the complexity of Tau post-translational modification, one  
2 cannot rule out that the aggregation may be mediated by some unidentified  
3 modification(s) of Tau. It is also possible that other factors, such as molecules that bind  
4 to Tau, may precipitate the aggregation.

5         Although the underlying mechanism is still unclear, our finding of Tau pathology  
6 in these mice establishes a causal link between the expression of amyloidogenic APP  
7 transgenes and a dysregulation of Tau assembly. Our data also suggest a possibility that  
8 PTP $\sigma$  depletion may suppress tau aggregation by reducing amyloidogenic products of  
9 APP.

10         Malfunction of Tau is broadly recognized as a neurodegenerative marker since it  
11 indicates microtubule deterioration <sup>7</sup>. The constraining effect on Tau aggregation by  
12 genetic depletion of PTP $\sigma$  thus provides additional evidence for the role of this receptor  
13 as a pivotal regulator of neuronal integrity.

14

#### 15 **PTP $\sigma$ deficiency rescues behavioral deficits in AD mouse models.**

16         We next assessed whether the alleviation of neuropathologies by PTP $\sigma$  depletion  
17 is accompanied with a rescue from AD relevant behavioral deficits. The most common  
18 symptoms of AD include short-term memory loss and apathy among the earliest,  
19 followed by spatial disorientation amid impairment of many cognitive functions as the  
20 dementia progresses. Using Y maze and novel object assays as surrogate models, we  
21 evaluated these cognitive and psychiatric features in the TgAPP-SwDI and TgAPP-  
22 SwInd mice.

1           The Y-maze assay, which allows mice to freely explore three identical arms,  
2       measures their short-term spatial memory. It is based on the natural tendency of mice to  
3       alternate arm exploration without repetitions. The performance is scored by the  
4       percentage of spontaneous alternations among total arm entries, and a higher score  
5       indicates better spatial navigation. Compared to the non-transgenic wild type mice within  
6       the colony, the APP-SwDI(+) $PTP\sigma$ (+/+) mice show a clear deficit in their performance.  
7       Genetic depletion of  $PTP\sigma$  in the APP-SwDI(+) $PTP\sigma$ (-/-) mice, however, unequivocally  
8       restores the cognitive performance back to the level of non-transgenic wild type mice  
9       (Fig. 6a, Extended Data Fig. 8).

10           Apathy, the most common neuropsychiatric symptom reported among individuals  
11       with AD, is characterized by a loss of motivation and diminished attention to novelty, and  
12       has been increasingly adopted into early diagnosis of preclinical and early prodromal AD  
13       <sup>33-35</sup>. Many patients in early stage AD lose attention to novel aspects of their environment  
14       despite their ability to identify novel stimuli, suggesting an underlying defect in the  
15       circuitry responsible for further processing of the novel information <sup>33,34</sup>. As a key feature  
16       of apathy, such deficits in attention to novelty can be accessed by the “curiosity figures  
17       task” or the “oddball task” in patients <sup>33,34,36</sup>. These visual-based novelty encoding tasks  
18       are very similar to the novel object assay for rodents, which measures the interest of  
19       animals in a novel object (NO) when they are exposed simultaneously to a  
20       prefamiliarized object (FO). We therefore used this assay to test the attention to novelty  
21       in the APP transgenic mice. When mice are pre-trained to recognize the FO, their  
22       attention to novelty is then measured by the discrimination index denoted as the ratio of  
23       NO exploration to total object exploration (NO+FO), or alternatively, by the ratio of NO



1 exploration to FO exploration. Whereas both ratios are commonly used, a combination of  
2 these assessments provides a more comprehensive evaluation of animal behavior. In this  
3 test, as indicated by both measurements, the expression of APP-SwDI transgene in the  
4 APP-SwDI(+) $PTP\sigma$ (+/+) mice leads to a substantial decrease in NO exploration as  
5 compared to non-transgenic wild type mice (Fig. 6b, c; Extended Data Fig. 9). Judging by  
6 their NO/FO ratios, it is evident that both the transgenic and non-transgenic groups are  
7 able to recognize and differentiate between the two objects (Extended Data Fig. 9a, b).  
8 Thus, the reduced NO exploration by the APP-SwDI(+) $PTP\sigma$ (+/+) mice may reflect a  
9 lack of interest in the NO or an inability to shift attention to the NO. Once again, this  
10 behavioral deficit is largely reversed by  $PTP\sigma$  deficiency in the APP-SwDI(+) $PTP\sigma$ (-/-)  
11 mice (Fig. 6b, c; Extended Data Fig. 9), consistent with previous observation of increased  
12 NO preference in the absence of  $PTP\sigma$ <sup>27</sup>.

13 To further verify the effects of  $PTP\sigma$  on these behavioral aspects, we additionally  
14 tested the TgAPP-SwInd mice in both assays and observed similar results, confirming an  
15 improvement on both short-term spatial memory and attention to novelty upon genetic  
16 depletion of  $PTP\sigma$  (Extended Data Fig. 10).

17

## 18 **Discussion**

19 Here we report that  $\beta$ -amyloidosis and several downstream disease features are  
20 dependent on  $PTP\sigma$  in two mouse models of genetically inherited AD. This form of AD  
21 develops inevitably in people who carry gene mutations that promote amyloidogenic  
22 processing of APP and overproduction of  $A\beta$ . Our data suggest that targeting  $PTP\sigma$  is a  
23 potential therapeutic approach that could overcome such dominant genetic driving forces

1 to curtail AD progression. The advantage of this targeting strategy is that it suppresses  
2 A $\beta$  accumulation without broadly affecting other major substrates of the  $\beta$ - and  $\gamma$ -  
3 secretases, thus predicting a more promising translational potential as compared to those  
4 in clinical trials that generically inhibit the secretases.

5 PTP $\sigma$  was previously characterized as a neuronal receptor of the chondroitin  
6 sulfate- and heparan sulfate-proteoglycans (CSPGs and HSPGs)<sup>8,9</sup>. In response to these  
7 two classes of extracellular ligands, PTP $\sigma$  functions as a “molecular switch” by  
8 regulating neuronal behavior in opposite manners<sup>10</sup>. Our finding of a pivotal role for the  
9 proteoglycan sensor PTP $\sigma$  in AD pathogenesis may therefore implicate an involvement  
10 of the perineuronal matrix in AD etiology.

11 More than 95% of AD cases are sporadic, which are not genetically inherited but  
12 likely result from insults to the brain that occurred earlier in life. AD risk factors, such as  
13 traumatic brain injury and cerebral ischemia<sup>37-40</sup>, have been shown to induce  
14 overproduction of A $\beta$  in both human and rodents<sup>41-45</sup>, and speed up progression of this  
15 dementia in animal models<sup>46-48</sup>. However, what promotes the amyloidogenic processing  
16 of APP in these cases is still a missing piece of the puzzle in understanding the AD-  
17 causing effects of these notorious risk factors.

18 Coincidentally, both traumatic brain injury and cerebral ischemia cause pronounced  
19 remodeling of the perineuronal microenvironment at lesion sites, marked by increased  
20 expression of CSPGs<sup>49-52</sup>, a major component of the perineuronal net that is upregulated  
21 during neuroinflammation and glial scar formation<sup>53-55</sup>. In the brains of AD patients,  
22 CSPGs were found associated with A $\beta$  depositions, further suggesting an uncanny  
23 involvement of these proteoglycans in AD development<sup>56</sup>. On the other hand, analogues

1 of heparan sulfate (HS, carbohydrate side chains of HSPGs that bind to PTP $\sigma$ ) were  
2 shown to inhibit BACE1 activity, suggesting their function in preventing A $\beta$   
3 overproduction<sup>57</sup>. After cerebral ischemia, however, the expression of Heparanase, an  
4 enzyme that degrades HS, was found markedly increased<sup>58</sup>. Collectively, these findings  
5 suggest a disrupted molecular balance between CSPGs and HSPGs in brains after lesion,  
6 which may ignite insidious signaling cascades preceding the onset of AD.

7 We hence speculate upon a mechanism for further study, whereby chronic CSPG  
8 upregulation or HSPG degradation in lesioned brains may sustain aberrant signaling  
9 through their neuronal sensor PTP $\sigma$ , leading to biased processing of APP and a  
10 neurotoxic “A $\beta$  cascade”. As such, altered signaling from PTP $\sigma$  after traumatic brain  
11 injury and ischemic stroke may explain how these risk factors can trigger subsequent  
12 onset of AD. Restoring the integrity of brain microenvironment therefore could be  
13 essential in preventing AD for the population at risk.

## References:

1. Selkoe, D.J. Alzheimer's disease. *Cold Spring Harbor perspectives in biology* 3(2011).
2. Yan, R. & Vassar, R. Targeting the beta secretase BACE1 for Alzheimer's disease therapy. *The Lancet. Neurology* 13, 319-329 (2014).
3. Mikulca, J.A., *et al.* Potential novel targets for Alzheimer pharmacotherapy: II. Update on secretase inhibitors and related approaches. *Journal of clinical pharmacy and therapeutics* 39, 25-37 (2014).
4. De Strooper, B. Lessons from a failed gamma-secretase Alzheimer trial. *Cell* 159, 721-726 (2014).
5. Arriagada, P.V., Growdon, J.H., Hedley-Whyte, E.T. & Hyman, B.T. Neurofibrillary tangles but not senile plaques parallel duration and severity of Alzheimer's disease. *Neurology* 42, 631-639 (1992).
6. Bouras, C., Hof, P.R., Giannakopoulos, P., Michel, J.P. & Morrison, J.H. Regional distribution of neurofibrillary tangles and senile plaques in the cerebral cortex of elderly patients: a quantitative evaluation of a one-year autopsy population from a geriatric hospital. *Cerebral cortex* 4, 138-150 (1994).
7. Wang, Y. & Mandelkow, E. Tau in physiology and pathology. *Nature reviews. Neuroscience* 17, 5-21 (2016).
8. Aricescu, A.R., McKinnell, I.W., Halfter, W. & Stoker, A.W. Heparan sulfate proteoglycans are ligands for receptor protein tyrosine phosphatase sigma. *Molecular and cellular biology* 22, 1881-1892 (2002).
9. Shen, Y., *et al.* PTPsigma is a receptor for chondroitin sulfate proteoglycan, an inhibitor of neural regeneration. *Science* 326, 592-596 (2009).
10. Coles, C.H., *et al.* Proteoglycan-specific molecular switch for RPTPsigma clustering and neuronal extension. *Science* 332, 484-488 (2011).
11. Wang, H., *et al.* Expression of receptor protein tyrosine phosphatase-sigma (RPTP-sigma) in the nervous system of the developing and adult rat. *Journal of neuroscience research* 41, 297-310 (1995).
12. Yan, H., *et al.* A novel receptor tyrosine phosphatase-sigma that is highly expressed in the nervous system. *The Journal of biological chemistry* 268, 24880-24886 (1993).
13. Chow, V.W., Mattson, M.P., Wong, P.C. & Gleichmann, M. An overview of APP processing enzymes and products. *Neuromolecular medicine* 12, 1-12 (2010).
14. Nunan, J. & Small, D.H. Regulation of APP cleavage by alpha-, beta- and gamma-secretases. *FEBS letters* 483, 6-10 (2000).
15. Estus, S., *et al.* Potentially amyloidogenic, carboxyl-terminal derivatives of the amyloid protein precursor. *Science* 255, 726-728 (1992).
16. Davis, J., *et al.* Early-onset and robust cerebral microvascular accumulation of amyloid beta-protein in transgenic mice expressing low levels of a vasculotropic Dutch/Iowa mutant form of amyloid beta-protein precursor. *The Journal of biological chemistry* 279, 20296-20306 (2004).

17. Mucke, L., *et al.* High-level neuronal expression of abeta 1-42 in wild-type human amyloid protein precursor transgenic mice: synaptotoxicity without plaque formation. *The Journal of neuroscience : the official journal of the Society for Neuroscience* 20, 4050-4058 (2000).
18. Fleck, D., Garratt, A.N., Haass, C. & Willem, M. BACE1 dependent neuregulin processing: review. *Current Alzheimer research* 9, 178-183 (2012).
19. Luo, X., *et al.* Cleavage of neuregulin-1 by BACE1 or ADAM10 protein produces differential effects on myelination. *The Journal of biological chemistry* 286, 23967-23974 (2011).
20. Cheret, C., *et al.* Bace1 and Neuregulin-1 cooperate to control formation and maintenance of muscle spindles. *The EMBO journal* 32, 2015-2028 (2013).
21. De Strooper, B., *et al.* A presenilin-1-dependent gamma-secretase-like protease mediates release of Notch intracellular domain. *Nature* 398, 518-522 (1999).
22. Tian, Y., Bassit, B., Chau, D. & Li, Y.M. An APP inhibitory domain containing the Flemish mutation residue modulates gamma-secretase activity for Abeta production. *Nature structural & molecular biology* 17, 151-158 (2010).
23. Zhang, Z., *et al.* Presenilins are required for gamma-secretase cleavage of beta-APP and transmembrane cleavage of Notch-1. *Nature cell biology* 2, 463-465 (2000).
24. Glass, C.K., Saijo, K., Winner, B., Marchetto, M.C. & Gage, F.H. Mechanisms underlying inflammation in neurodegeneration. *Cell* 140, 918-934 (2010).
25. DeWitt, D.A., Perry, G., Cohen, M., Doller, C. & Silver, J. Astrocytes regulate microglial phagocytosis of senile plaque cores of Alzheimer's disease. *Experimental neurology* 149, 329-340 (1998).
26. Frederickson, R.C. Astroglia in Alzheimer's disease. *Neurobiology of aging* 13, 239-253 (1992).
27. Horn, K.E., *et al.* Receptor protein tyrosine phosphatase sigma regulates synapse structure, function and plasticity. *Journal of neurochemistry* 122, 147-161 (2012).
28. Tomidokoro, Y., *et al.* Abeta amyloidosis induces the initial stage of tau accumulation in APP(Sw) mice. *Neuroscience letters* 299, 169-172 (2001).
29. Sturchler-Pierrat, C., *et al.* Two amyloid precursor protein transgenic mouse models with Alzheimer disease-like pathology. *Proceedings of the National Academy of Sciences of the United States of America* 94, 13287-13292 (1997).
30. Rockenstein, E., Mallory, M., Mante, M., Sisk, A. & Masliah, E. Early formation of mature amyloid-beta protein deposits in a mutant APP transgenic model depends on levels of Abeta(1-42). *Journal of neuroscience research* 66, 573-582 (2001).
31. Holtzman, D.M., *et al.* Tau: From research to clinical development. *Alzheimer's & dementia : the journal of the Alzheimer's Association* (2016).
32. Morris, M., *et al.* Tau post-translational modifications in wild-type and human amyloid precursor protein transgenic mice. *Nature neuroscience* 18, 1183-1189 (2015).

33. Daffner, K.R., *et al.* Pathophysiology underlying diminished attention to novel events in patients with early AD. *Neurology* 56, 1377-1383 (2001).
34. Daffner, K.R., Mesulam, M.M., Cohen, L.G. & Scinto, L.F. Mechanisms underlying diminished novelty-seeking behavior in patients with probable Alzheimer's disease. *Neuropsychiatry, neuropsychology, and behavioral neurology* 12, 58-66 (1999).
35. Marin, R.S., Biedrzycki, R.C. & Firinciogullari, S. Reliability and validity of the Apathy Evaluation Scale. *Psychiatry research* 38, 143-162 (1991).
36. Kaufman, D.A., Bowers, D., Okun, M.S., Van Patten, R. & Perlstein, W.M. Apathy, Novelty Processing, and the P3 Potential in Parkinson's Disease. *Frontiers in neurology* 7, 95 (2016).
37. Johnson, V.E., Stewart, W. & Smith, D.H. Traumatic brain injury and amyloid-beta pathology: a link to Alzheimer's disease? *Nature reviews. Neuroscience* 11, 361-370 (2010).
38. Sivanandam, T.M. & Thakur, M.K. Traumatic brain injury: a risk factor for Alzheimer's disease. *Neuroscience and biobehavioral reviews* 36, 1376-1381 (2012).
39. Kalaria, R.N. The role of cerebral ischemia in Alzheimer's disease. *Neurobiology of aging* 21, 321-330 (2000).
40. Cole, S.L. & Vassar, R. Linking vascular disorders and Alzheimer's disease: potential involvement of BACE1. *Neurobiology of aging* 30, 1535-1544 (2009).
41. Emmerling, M.R., *et al.* Traumatic brain injury elevates the Alzheimer's amyloid peptide A beta 42 in human CSF. A possible role for nerve cell injury. *Annals of the New York Academy of Sciences* 903, 118-122 (2000).
42. Olsson, A., *et al.* Marked increase of beta-amyloid(1-42) and amyloid precursor protein in ventricular cerebrospinal fluid after severe traumatic brain injury. *Journal of neurology* 251, 870-876 (2004).
43. Loane, D.J., *et al.* Amyloid precursor protein secretases as therapeutic targets for traumatic brain injury. *Nature medicine* 15, 377-379 (2009).
44. Pluta, R., Furmaga-Jablonska, W., Maciejewski, R., Ulamek-Koziol, M. & Jablonski, M. Brain ischemia activates beta- and gamma-secretase cleavage of amyloid precursor protein: significance in sporadic Alzheimer's disease. *Molecular neurobiology* 47, 425-434 (2013).
45. Washington, P.M., *et al.* The effect of injury severity on behavior: a phenotypic study of cognitive and emotional deficits after mild, moderate, and severe controlled cortical impact injury in mice. *Journal of neurotrauma* 29, 2283-2296 (2012).
46. Kokiko-Cochran, O., *et al.* Altered Neuroinflammation and Behavior after Traumatic Brain Injury in a Mouse Model of Alzheimer's Disease. *Journal of neurotrauma* (2015).
47. Tajiri, N., Kellogg, S.L., Shimizu, T., Arendash, G.W. & Borlongan, C.V. Traumatic brain injury precipitates cognitive impairment and extracellular Abeta aggregation in Alzheimer's disease transgenic mice. *PloS one* 8, e78851 (2013).
48. Watanabe, T., Takasaki, K., Yamagata, N., Fujiwara, M. & Iwasaki, K. Facilitation of memory impairment and cholinergic disturbance in a mouse

- model of Alzheimer's disease by mild ischemic burden. *Neuroscience letters* 536, 74-79 (2013).
49. Properzi, F., *et al.* Chondroitin 6-sulphate synthesis is up-regulated in injured CNS, induced by injury-related cytokines and enhanced in axon-growth inhibitory glia. *The European journal of neuroscience* 21, 378-390 (2005).
  50. Yi, J.H., *et al.* Alterations in sulfated chondroitin glycosaminoglycans following controlled cortical impact injury in mice. *The Journal of comparative neurology* 520, 3295-3313 (2012).
  51. Hill, J.J., Jin, K., Mao, X.O., Xie, L. & Greenberg, D.A. Intracerebral chondroitinase ABC and heparan sulfate proteoglycan glypican improve outcome from chronic stroke in rats. *Proceedings of the National Academy of Sciences of the United States of America* 109, 9155-9160 (2012).
  52. Huang, L., *et al.* Glial scar formation occurs in the human brain after ischemic stroke. *International journal of medical sciences* 11, 344-348 (2014).
  53. Celio, M.R. & Blumcke, I. Perineuronal nets--a specialized form of extracellular matrix in the adult nervous system. *Brain research. Brain research reviews* 19, 128-145 (1994).
  54. Cregg, J.M., *et al.* Functional regeneration beyond the glial scar. *Experimental neurology* 253, 197-207 (2014).
  55. Soleman, S., Filippov, M.A., Dityatev, A. & Fawcett, J.W. Targeting the neural extracellular matrix in neurological disorders. *Neuroscience* 253, 194-213 (2013).
  56. DeWitt, D.A., Silver, J., Canning, D.R. & Perry, G. Chondroitin sulfate proteoglycans are associated with the lesions of Alzheimer's disease. *Experimental neurology* 121, 149-152 (1993).
  57. Patey, S.J., Edwards, E.A., Yates, E.A. & Turnbull, J.E. Heparin derivatives as inhibitors of BACE-1, the Alzheimer's beta-secretase, with reduced activity against factor Xa and other proteases. *Journal of medicinal chemistry* 49, 6129-6132 (2006).
  58. Li, J., *et al.* Expression of heparanase in vascular cells and astrocytes of the mouse brain after focal cerebral ischemia. *Brain research* 1433, 137-144 (2012).
  59. Elchebly, M., *et al.* Neuroendocrine dysplasia in mice lacking protein tyrosine phosphatase sigma. *Nature genetics* 21, 330-333 (1999).

## Supplementary Materials:

### Materials and Methods:

**Mouse lines:** Mice were maintained under standard conditions approved by the Institutional Animal Care and Use Committee. Wild type and PTP $\sigma$ -deficient mice of Balb/c background were provided by Dr. Michel L. Tremblay<sup>59</sup>. Homozygous TgAPP-SwDI mice, C57BL/6-Tg(Thy1-APPSwDutIowa)BWvnr/Mmjax, stock number 007027, were from the Jackson Laboratory. These mice express human APP transgene harboring Swedish, Dutch, and Iowa mutations, and were bred with Balb/c mice heterozygous for the PTP $\sigma$  gene to generate bigenic mice heterozygous for both TgAPP-SwDI and PTP $\sigma$  genes, which are hybrids of 50% C57BL/6J and 50% Balb/c genetic background. These mice were further bred with Balb/c mice heterozygous for the PTP $\sigma$  gene. The offspring from this mating are used in experiments, which include littermates of the following genotypes: TgAPP-SwDI(+/-)PTP $\sigma$ (+/+), mice heterozygous for TgAPP-SwDI transgene with wild type PTP $\sigma$ ; TgAPP-SwDI(+/-)PTP $\sigma$ (-/-), mice heterozygous for TgAPP-SwDI transgene with genetic depletion of PTP $\sigma$ ; TgAPP-SwDI(-/-)PTP $\sigma$ (+/+), mice free of TgAPP-SwDI transgene with wild type PTP $\sigma$ . Both TgAPP-SwDI(-/-)PTP $\sigma$ (+/+) and Balb/c PTP $\sigma$ (+/+) are wild type mice but with different genetic background. Heterozygous TgAPP-SwInd (J20) mice, 6.Cg-Tg(PDGFB-APPSwInd)20Lms/2Mmjax, were provided by Dr. Lennart Mucke. These mice express human APP transgene harboring Swedish and Indiana mutations, and were bred with the same strategy as described above to obtain mice with genotypes of TgAPP-SwInd (+/-)PTP $\sigma$ (+/+) and TgAPP-SwInd (+/-)PTP $\sigma$ (-/-).



## Antibodies:

| Primary Antibodies                       | Application        | Clone #   | Catalog #   | Supplier                 |
|------------------------------------------|--------------------|-----------|-------------|--------------------------|
| Mouse anti-Actin                         | WB                 | AC-40     | A4700       | Sigma-Aldrich            |
| Rabbit anti-APH1                         | WB                 |           | PA5-20318   | Thermo Scientific        |
| Rabbit anti-APP C-term                   | WB, IP, IHC        | Y188      | NB110-55461 | Novus Biologicals        |
| Mouse anti-murine A $\beta$ , 1-16       | WB, IP             | M3.2      | 805701      | Biologend                |
| Mouse anti-human A $\beta$ , 1-16        | WB, IP, IHC, ELISA | 6E10      | 803001      | Biologend                |
| Mouse anti-A $\beta$ , 17-24             | WB, IHC            | 4G8       | SIG-39220   | Biologend                |
| Mouse HRP-conjugated anti-A $\beta$ 1-40 | ELISA              | 11A50-B10 | SIG-39146   | Biologend                |
| Mouse HRP-conjugated anti-A $\beta$ 1-42 | ELISA              | 12F4      | 805507      | Biologend                |
| Rabbit anti-BACE1 C-Term, B690           | WB                 |           | PRB-617C    | Covance                  |
| Guinea Pig anti-BACE1 C-Term             | IP                 |           | 840201      | Biologend                |
| Chicken anti-GFAP                        | IHC                |           | ab4674      | Abcam                    |
| Rabbit anti-Neuregulin                   | WB                 |           | sc-348      | Santa Cruz Biotechnology |
| Rabbit anti-Nicastrin                    | WB                 |           | 5665        | Cell Signaling           |
| Rabbit anti-Notch NICD (val1744)         | WB                 |           | 4147        | Cell Signaling           |
| Rabbit anti-Notch (C-20)                 | WB                 |           | sc-6014R    | Santa Cruz Biotechnology |
| Rabbit anti-PEN2                         | WB                 |           | 8598        | Cell Signaling           |
| Rabbit anti-Presenilin 1/2 NTF           | WB                 |           | 840201      | Abcam                    |
| Rabbit anti-Presenilin 1 CTF             | WB                 |           | 5643        | Cell Signaling           |
| Rabbit anti-Presenilin 2 CTF             | WB                 |           | 9979        | Cell Signaling           |
| Mouse anti-PTP $\sigma$ ICD              | WB, IHC            | 17G7.2    | MM-002-P    | Medimabs                 |
| Mouse anti-PTP $\sigma$ ECD              | WB                 |           | ab55640     | Abcam                    |
| Rabbit anti-Synaptophysin                | IHC                |           | AB9272      | Millipore                |
| Mouse anti-Tau                           | WB, IHC            | Tau-5     | MAB361      | Millipore                |
| Mouse anti-Tau                           | IHC                | Tau-46    | 4019        | Cell Signaling           |
| Secondary and Tertiary Antibodies        | Application        | Clone #   | Catalog #   | Supplier                 |
| Goat anti-mouse IgG HRP-conjugated       | WB                 |           | 7076S       | Cell Signaling           |
| Goat anti-rabbit IgG HRP-conjugated      | WB                 |           | 7074S       | Cell Signaling           |
| Goat anti-mouse IgG Alexa488             | IHC                |           | A-11001     | Invitrogen               |
| Donkey anti-goat IgG Alexa488            | IHC                |           | A-11055     | Invitrogen               |
| Chicken anti-rabbit IgG CF568            | IHC                |           | SAB4600426  | Sigma-Aldrich            |
| Donkey anti-chicken IgG Cy3              | IHC                |           | 703-165-155 | JacksonImmunoResearch    |

**Immunohistochemistry:** Adult rat and mice were perfused intracardially with fresh made 4% paraformaldehyde in cold phosphate-buffered saline (PBS). The brains were collected and post-fixed for 2 days at 4 °C. Paraffin embedded sections of 10  $\mu$ M thickness were collected for immunostaining. The sections were deparaffinized and sequentially rehydrated. Antigen retrieval was performed at 100 °C in Tris-EDTA buffer (pH 9.0) for 50 min. Sections were subsequently washed with distilled water and PBS, incubated at room temperature for 1 hour in blocking buffer (PBS, with 5% normal donkey serum, 5% normal goat serum, and 0.2% Triton X-100). Primary antibody

incubation was performed in a humidified chamber at 4°C overnight. After 3 washes in PBS with 0.2% Triton X-100, the sections were then incubated with a mixture of secondary and tertiary antibodies at room temperature for 2 hours. All antibodies were diluted in blocking buffer with concentrations recommended by the manufacturers. Mouse primary antibodies were detected by goat anti-mouse Alexa488 together with donkey anti-goat Alexa488 antibodies; rabbit primary antibodies were detected by chicken anti-rabbit CF568 and donkey anti-chicken Cy3 antibodies; chicken antibody was detected with donkey anti-chicken Cy3 antibody. Sections stained with only secondary and tertiary antibodies (without primary antibodies) were used as negative controls. At last, DAPI (Invitrogen, 300 nM) was applied on sections for nuclear staining. Sections were washed 5 times before mounted in Fluoromount (SouthernBiotech).

Wide field and confocal images were captured using Zeiss Axio Imager M2 and LSM780, respectively. Images are quantified using the Zen 2 Pro software and ImageJ.

**Protein extraction, immunoprecipitation, and western blot analysis:** For the co-immunoprecipitation of APP and PTP $\sigma$ , RIPA buffer was used (50 mM Tris-HCl, pH 8.0, 1 mM EDTA, 150 mM NaCl, 1% NP40, 0.1% SDS, 0.5% sodium deoxycholate). For the co-immunoprecipitation of APP and BACE1, NP40 buffer was used (50 mM Tris-HCl, pH 8.0, 1 mM EDTA, 150 mM NaCl, 1% NP40) without or with SDS at concentration of 0.1%, 0.3%, and 0.4%. For total protein extraction and immunopurification of CTF $\beta$ , SDS concentration in RIPA buffer was adjusted to 1% to ensure protein extraction from the lipid rafts. Mouse or rat forebrains were homogenized thoroughly on ice in homogenization buffers (as mention above) containing protease and

phosphatase inhibitors (Thermo Scientific). For each half of forebrain, buffer volume of at least 5 ml for mouse and 8 ml for rat was used to ensure sufficient detergent/tissue ratio. The homogenates were incubated at 4°C for 1 hour with gentle mixing, sonicated on ice for 2 minutes in a sonic dismembrator (Fisher Scientific Model 120, with pulses of 50% output, 1 second on and 1 second off), followed with another hour of gentle mixing at 4°C. All samples were used fresh without freezing and thawing.

For co-immunoprecipitation and immunopurification, the homogenates were then centrifuged at 85,000 x g for 1 hour at 4°C and the supernatants were collected. Protein concentration was measured using BCA Protein Assay Kit (Thermo Scientific). 0.5 mg total proteins of brain homogenates were incubated with 5 µg of designated antibody and 30 µl of Protein-A sepharose beads (50% slurry, Roche), in a total volume of 1 ml adjusted with RIPA buffer. Samples were gently mixed at 4°C overnight. Subsequently, the beads were washed 5 times with cold immunoprecipitation buffer. Samples were then incubated in Laemmli buffer with 100 mM of DTT at 75°C for 20 minutes and subjected to western blot analysis.

For analysis of protein expression level, the homogenates were centrifuged at 23,000 x g for 30 min at 4°C and the supernatants were collected. Protein concentration was measured using BCA Protein Assay Kit (Thermo Scientific). 30 µg of total proteins were subjected to western blot analysis.

Electrophoresis of protein samples was conducted using 4-12% Bis-Tris Bolt Plus Gels, with either MOPS or MES buffer and Novex Sharp Pre-stained Protein Standard (all from Invitrogen). Proteins were transferred to nitrocellulose membrane (0.2 µm pore size, Bio-Rad) and blotted with selected antibodies (see table above) at concentrations

suggested by the manufacturers. Primary antibodies were diluted in SuperBlock TBS Blocking Buffer (Thermo Scientific) and incubated with the nitrocellulose membranes at 4°C overnight; secondary antibodies were diluted in PBS with 5% nonfat milk and 0.2% Tween20 and incubated at room temperature for 2 hours. Membranes were washed 4 times in PBS with 0.2% Tween20 between primary and secondary antibodies and before chemiluminescent detection with SuperSignal West Pico Chemiluminescent Substrate (Thermo Scientific).

Western blot band intensity was quantified by densitometry.

**A $\beta$  ELISA assays:** Mouse forebrains were thoroughly homogenized in tissue homogenization buffer (2 mM Tris pH 7.4, 250 mM sucrose, 0.5 mM EDTA, 0.5 mM EGTA) containing protease inhibitor cocktail (Roche), followed by centrifugation at 135,000 x g (33,500 RPM with SW50.1 rotor) for 1 hour at 4°C. Proteins in the pellets were extracted with formic acid (FA) and centrifuged at 109,000 x g (30,100 RPM with SW50.1 rotor) for 1 hour at 4°C. The supernatants were collected and diluted 1:20 in neutralization buffer (1 M Tris base, 0.5 M Na<sub>2</sub>HPO<sub>4</sub>, 0.05% NaN<sub>3</sub>) and subsequently 1:3 in ELISA buffer (PBS with 0.05% Tween-20, 1% BSA, and 1 mM AEBSF). Diluted samples were loaded onto ELISA plates pre-coated with 6E10 antibody (Biolegend) to capture A $\beta$  peptides. Serial dilutions of synthesized human A $\beta$  1-40 or 1-42 (American Peptide) were loaded to determine a standard curve. A $\beta$  was detected using an HRP labeled antibody for either A $\beta$  1-40 or 1-42 (see table above). ELISA was developed using TMB substrate (Thermo Scientific) and reaction was stopped with 1N HCl. Plates

were read at 450nm and concentrations of A $\beta$  in samples were determined using the standard curve.

**Behavior assays:** The Y-maze assay: Mice were placed in the center of the Y-maze and allowed to move freely through each arm. Their exploratory activities were recorded for 5 minutes. An arm entry is defined as when all four limbs are within the arm. For each mouse, the number of triads is counted as “spontaneous alternation”, which was then divided by the number of total arm entries, yielding a percentage score. The novel object test: On day 1, mice were exposed to empty cages (45 cm x 24 cm x 22 cm) with blackened walls to allow exploration and habituation to the arena. During day 2 to day 4, mice were returned to the same cage with two identical objects placed at an equal distance. On each day mice were returned to the cage at approximately the same time during the day and allowed to explore for 10 minutes. Cages and objects were cleaned with 70% ethanol between each animal. Subsequently, 2 hours after the familiarization session on day 4, mice were put back to the same cage where one of the familiar objects (randomly chosen) was replaced with a novel object, and allowed to explore for 5 minutes. Mice were scored using Observer software (Noldus) on their time duration and visiting frequency exploring either object. Object exploration was defined as facing the object and actively sniffing or touching the object, whereas any climbing behavior was not scored. The discrimination indexes reflecting interest in the novel object is denoted as either the ratio of novel object exploration to total object exploration (NO/NO+FO) or the ratio of novel object exploration to familiar object exploration (NO/FO). All tests and data analyses were conducted in a double-blinded manner.

**Statistics:** 2-tailed Student's *t* test was used for two-group comparison. Relationship between two variables (SDS concentration and APP-BACE1 association, as in Fig 3) was analyzed using linear regression. All error bars show standard error of the means (SEM).
